# Supplementary material for: Antigen receptor control of methionine metabolism in T cells
Source: eLife journal article supplement (doi:10.7554/elife.44210), 2019-03-27

Figure 1

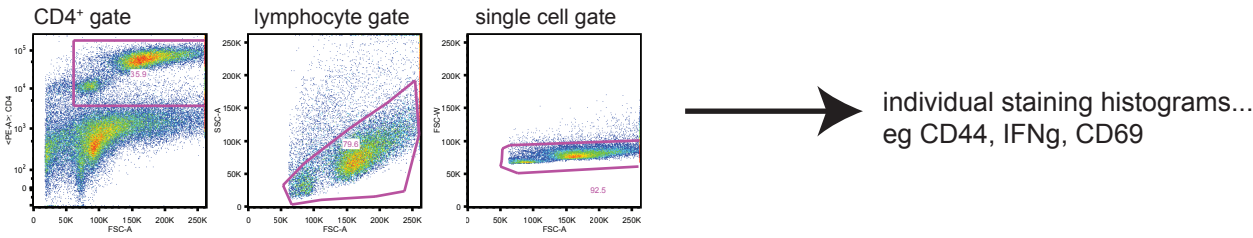

Figures 1 and 2

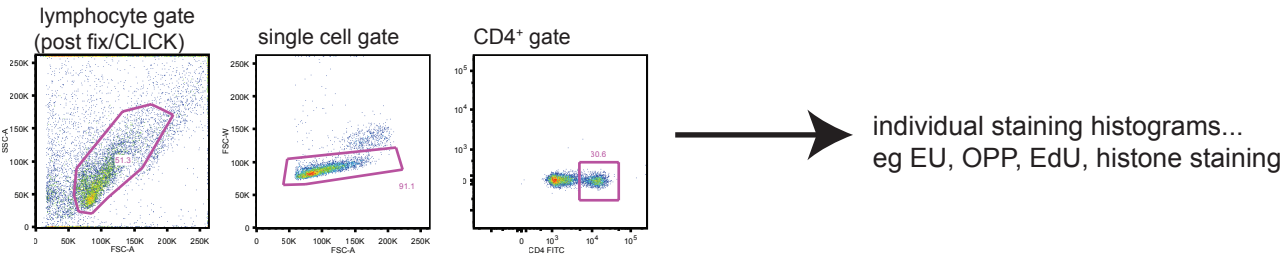

Figure 2

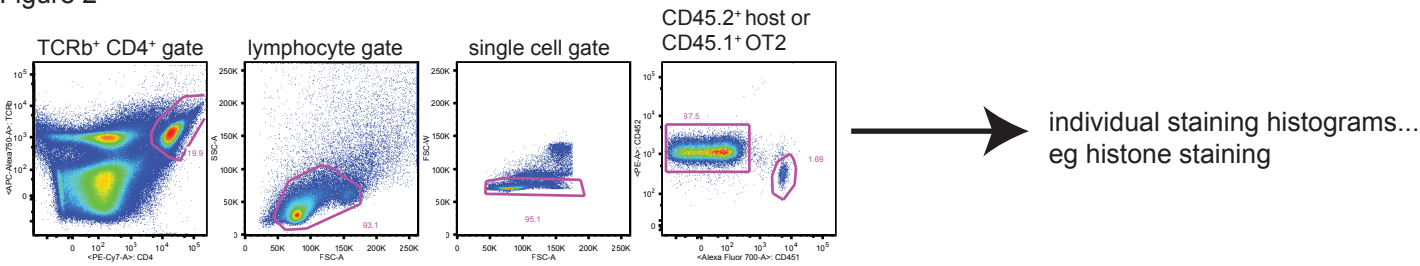

Supplement: supp [file elife-44210-supp-v1.zip]
